# Supplementary material for: Reproducible Colonization of Germ-Free Mice With the Oligo-Mouse-Microbiota in Different Animal Facilities
Source: Front Microbiol. 2020 Jan 10;10:2999. doi: 10.3389/fmicb.2019.02999 (PMC6965490; doi:10.3389/fmicb.2019.02999)
Supplement: Supplementary file 4 [file Table_1.XLSX]

## Sheet: table_S1
Supplementary Table S1. PERMANOVA analysis of Bray-Curtis dissimilarities of data shown in Figure 3C
pairs	F.Model	R2	p.value	p.adjusted	p.stars
1-1 vs 2	6.46819894501165	0.370284249988964	0.00459908018396321	0.0128974205158968	*
1-1 vs 3	0.645685224469265	0.0554441591047461	0.580483903219356	0.580483903219356
1-1 vs 4-1	1.48402647638422	0.110058110534218	0.240151969606079	0.288182363527295
2 vs 3	8.93657196430092	0.527649395824463	0.00679864027194561	0.0128974205158968	*
2 vs 4-1	21.9004972008613	0.70874255059724	0.0023995200959808	0.0128974205158968	*
3 vs 4-1	6.36787692551757	0.414362826848518	0.00859828034393121	0.0128974205158968	*
